# Supplementary material for: A colorimetric chemosensor for sensitive and selective detection of copper(ii) ions based on catalytic oxidation of 1-naphthylamine
Source: Royal Society of Chemistry journal article supplement (doi:10.1039/d3an00536d), 2023-01-01
Supplement: d3an00536d1.pdf [file d3an00536d1.pdf]

## Supplementary Information

### **A colorimetric chemosensor for sensitive and selective detection of copper (II) ions based on catalytic oxidation of 1-naphthylamine**

Rui Cai,<sup>ab</sup> Chaudhary Ammar Shoukat,<sup>ab</sup> Chenqi Zhang,<sup>ab</sup> Xinshuang Gao,<sup>ab</sup> Hanbo Li,<sup>ab</sup> Jiaqi Chen,<sup>\*c</sup> Yinglu Ji,<sup>\*a</sup> and Xiaochun Wu<sup>ab</sup>

*<sup>a</sup>CAS Key Laboratory of Standardization and Measurement for Nanotechnology,  
National Center for Nanoscience and Technology, Beijing 100190, China.*

*Email: jiyi@nanoctr.cn*

*<sup>b</sup>University of the Chinese Academy of Sciences, Beijing 100049, China.*

*<sup>c</sup>School of Mechanical Engineering, Chengdu University, Chengdu 610000, China.*

*Email: chenjiaqi@cdu.edu.cn*

## Supplementary Experiment Information

**Chemical reagents.** 1-Naphthylamine hydrochloride ( $\alpha$ -NA·HCl), nickel chloride hexahydrate ( $\text{NiCl}_2\cdot 6\text{H}_2\text{O}$ ), cadmium nitrate tetrahydrate ( $\text{Cd}(\text{NO}_3)_2\cdot 4\text{H}_2\text{O}$ ), cerium nitrate hexahydrate ( $\text{Ce}(\text{NO}_3)_3\cdot 6\text{H}_2\text{O}$ ), and hydrogen peroxide ( $\text{H}_2\text{O}_2$ , 30 wt %) were ordered from Aladdin (Shanghai, China). Copper (II) chloride dihydrate ( $\text{CuCl}_2\cdot 2\text{H}_2\text{O}$ ) was obtained from Sinopharm Chemical Reagent Co., Ltd (Beijing, China). Manganese (II) chloride tetrahydrate ( $\text{MnCl}_2\cdot 4\text{H}_2\text{O}$ ), sodium citrate (Cit), cysteine (Cys), 2-mercaptoethylamine (MEA), 3-mercaptopropionic acid (MPA), and ascorbic acid (AA) was purchased from Sigma-Aldrich (Shanghai, China). Ethylenediaminetetraacetic acid (EDTA) solution (0.5 M, pH 8.0), iron (III) chloride ( $\text{FeCl}_3$ ), iron (II) chloride ( $\text{FeCl}_2$ ), sodium fluoride (NaF), cobalt nitrate hexahydrate ( $\text{Co}(\text{NO}_3)_2\cdot 6\text{H}_2\text{O}$ ), chromium(III) nitrate nonahydrate ( $\text{Cr}(\text{NO}_3)_3\cdot 9\text{H}_2\text{O}$ ), lead chloride ( $\text{PbCl}_2$ ), mercury nitrate monohydrate ( $\text{Hg}(\text{NO}_3)_2\cdot \text{H}_2\text{O}$ ), and zinc chloride ( $\text{ZnCl}_2$ ) were purchased from Macklin (Shanghai, China). Acetate buffers (HAc/NaAc buffer, 0.2 M) with pH values of 2.7, 3.4, 4.5, 5.6, and 6.5 were from Leagene (Beijing, China). Milli-Q water ( $18\text{ M}\Omega\cdot\text{cm}^{-1}$ ) was used for the preparation of all solutions.

**Characterization.** The catalytic reactions were carried out in cuvette and monitored using Varian Cary 60 ultraviolet-visible-near infrared (UV-Vis-NIR) spectrophotometer (Agilent Technologies, USA). Raman spectra were recorded from a Renishaw InVia Raman microscope.

## Supplementary Figure Information

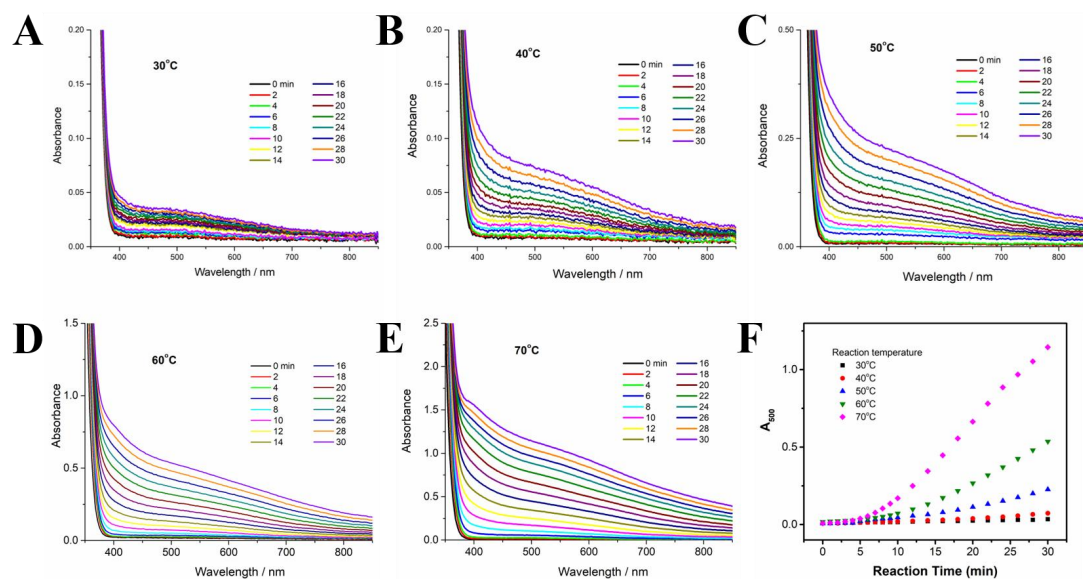

**Figure S1.** Effect of reaction temperature on the formation of the PNA. Evolutions of UV-vis absorption spectra during  $\alpha$ -NA oxidation by  $\text{H}_2\text{O}_2$  in the presence of  $5 \mu\text{M Cu}^{2+}$  at reaction temperature of (A) 30 °C, (B) 40 °C, (C) 50 °C, (D) 60 °C, and (E) 70 °C, respectively. (F) Initial reaction rates at different temperatures.  $[\alpha\text{-NA}] = 10 \text{ mM}$ ,  $[\text{H}_2\text{O}_2] = 10 \text{ mM}$ , and  $[\text{Cu}^{2+}] = 5 \mu\text{M}$ .

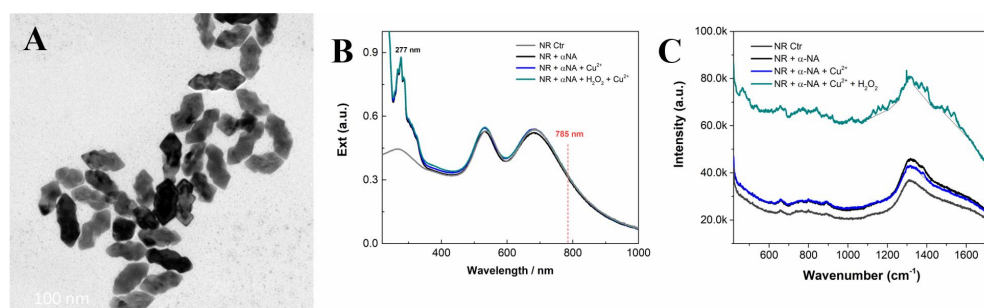

**Figure S2.** SERS characterization of PNA formation. (A) TEM image of nanorods. Extinction spectra of (B) NR suspensions before and after incubation with three solutions and corresponding SERS spectra (C) excited using a 785 nm laser.

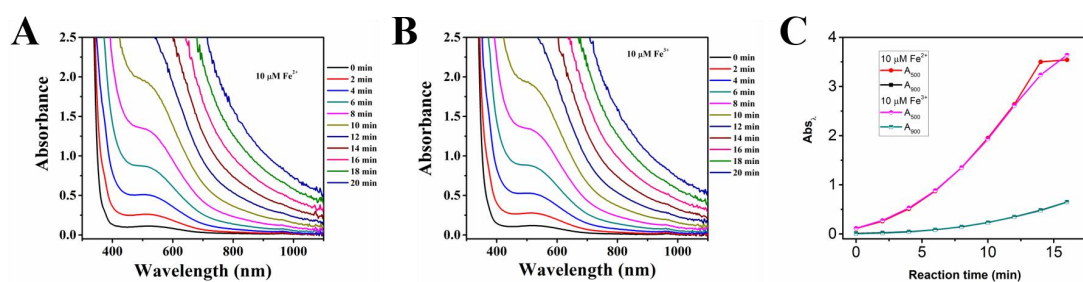

**Figure S3.**  $\text{Fe}^{2+}$ - or  $\text{Fe}^{3+}$ -catalyzed formation of PNA. A, B) Evolution of UV-vis absorption spectra during  $\alpha$ -NA oxidation by  $\text{H}_2\text{O}_2$  in the presence of  $10 \mu\text{M Fe}^{2+}$  or  $10 \mu\text{M Fe}^{3+}$  in 0.1 M

HAc/NaAc (pH4.5) buffer at the reaction temperature of 50 °C. [ $\alpha$ -NA] =10 mM, [ $\text{H}_2\text{O}_2$ ] = 10 mM. C)  $A_{500}$  and  $A_{900}$  vs reaction time.

### Fe-Fenton reactions

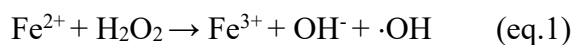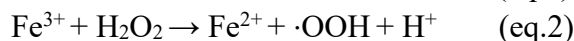

In our case, owing to the high concentration of  $\text{H}_2\text{O}_2$ , the conversion of  $\text{Fe}^{3+}$  to  $\text{Fe}^{2+}$  is not rate-limiting step (eq.2). Therefore, there is no obvious difference between the formation rate of the PNA catalyzed by  $\text{Fe}^{2+}$  and  $\text{Fe}^{3+}$ .

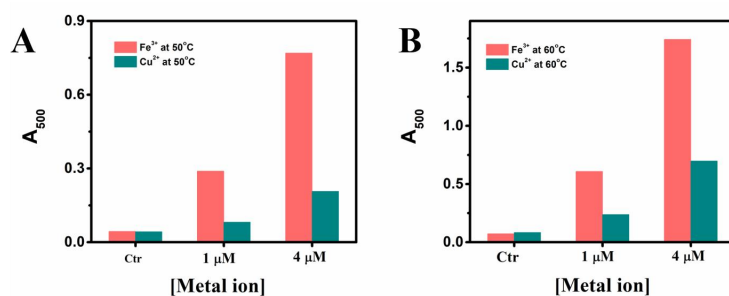

**Figure S4.** Comparison of  $\text{Fe}^{3+}$  and  $\text{Cu}^{2+}$  in catalyzing the oxidative polymerization of  $\alpha$ -NA. (A) 50 °C 20 min. (B) 60 °C 20 min. [ $\alpha$ -NA] =10 mM, [ $\text{H}_2\text{O}_2$ ] = 10 mM.

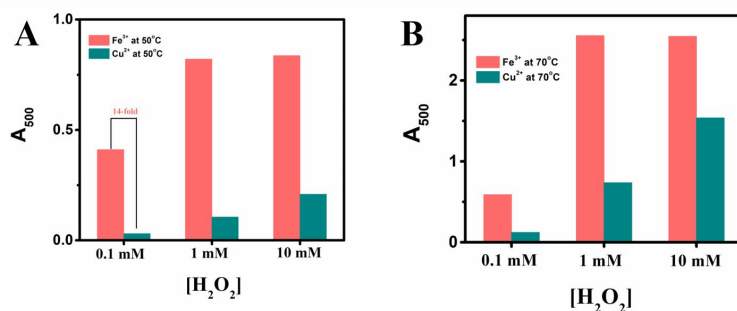

**Figure S5.** Different  $\text{H}_2\text{O}_2$  concentration dependence of  $\text{Fe}^{3+}$  and  $\text{Cu}^{2+}$  in catalyzing the oxidative polymerization of  $\alpha$ -NA. A) Reaction temperature of 60 °C for 20 min. B) Reaction temperature of 70 °C for 20 min. Reaction conditions: [ $\alpha$ -NA] =10 mM, [ $\text{Fe}^{3+}$ ] = 4  $\mu\text{M}$ . [ $\text{Cu}^{2+}$ ] = 4  $\mu\text{M}$ .

At 0.1 mM  $\text{H}_2\text{O}_2$ ,  $A_{500 \text{ nm}}$  from  $\text{Fe}^{3+}$ -catalyzed system is ca 15-fold of that from  $\text{Cu}^{2+}$ -catalyzed system. Therefore, 0.1 mM  $\text{H}_2\text{O}_2$  can be used to detect  $\text{Fe}^{3+}$ . At 1 mM  $\text{H}_2\text{O}_2$ ,  $\text{Fe}^{3+}$ -catalyzed system reached saturation with  $\text{H}_2\text{O}_2$  concentration, corresponding to a molar ratio of [ $\text{H}_2\text{O}_2$ ]/[ $\text{Fe}^{3+}$ ] of 250. In contrast, a linear concentration dependence between 0.1 mM to 10 mM was observed for  $\text{Cu}^{2+}$ -catalyzed system, which may be used for  $\text{H}_2\text{O}_2$  detection.

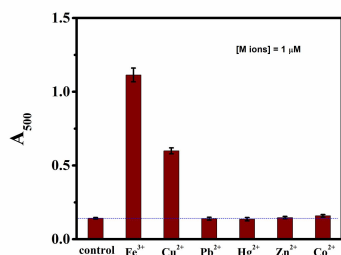

**Figure S6.** A<sub>500</sub> of reaction solutions obtained at the default reaction condition in the presence of different metallic ions at 1 μM.

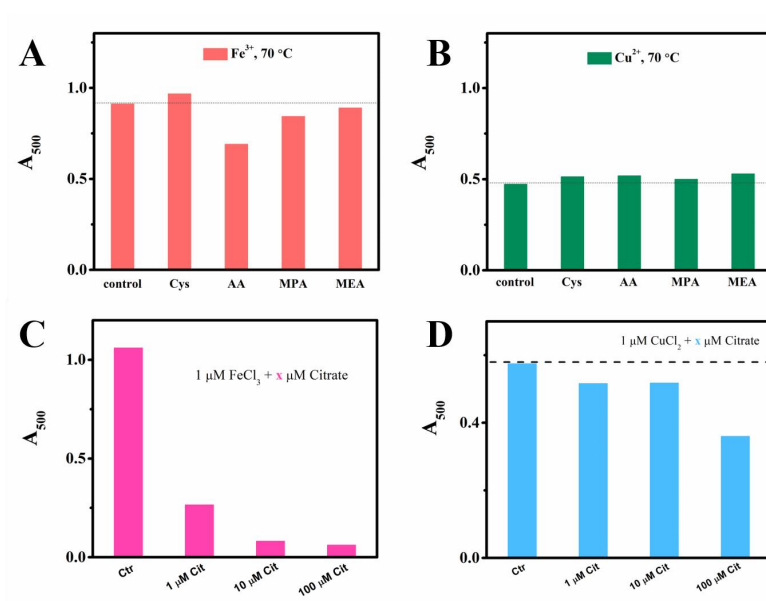

**Figure S7.** Effect of commonly employed masking agents of Fe<sup>3+</sup> (1 μM) and Cu<sup>2+</sup> (1 μM) on inhibiting their catalytic activities for the oxidative polymerization of α-NA at default reaction conditions. (A, B) In the absence or presence of 10 μM blocking agent. (C, D) Effects of citrate concentration.

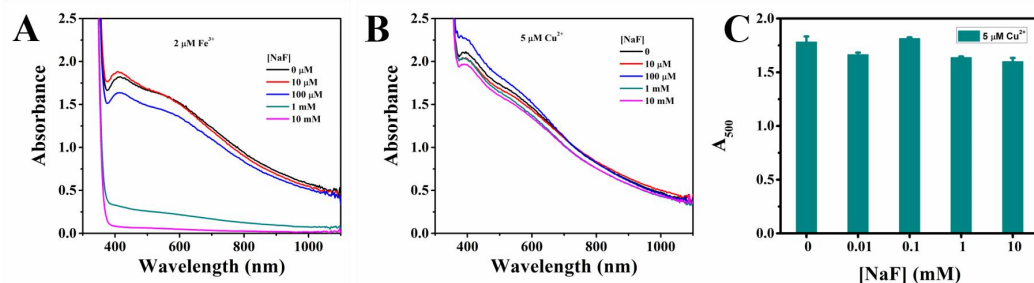

**Figure S8.** Effect of NaF concentration on catalytic activity. Absorbance spectra for 2 μM Fe<sup>3+</sup> (A) or 5 μM Cu<sup>2+</sup> (B) obtained at the default reaction conditions. (C) A<sub>500</sub> vs NaF concentration in Cu<sup>2+</sup>-catalyzed reaction.

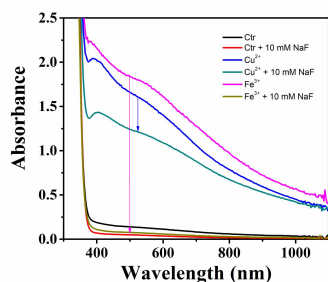

**Figure S9.** UV-vis absorption spectra of  $\alpha$ -NA oxidation at the default reaction condition catalyzed by  $\text{Cu}^{2+}$  or  $\text{Fe}^{3+}$  in the absence or presence of 10 mM NaF, respectively. Control groups were reaction solutions without adding  $\text{Cu}^{2+}$  or  $\text{Fe}^{3+}$ .

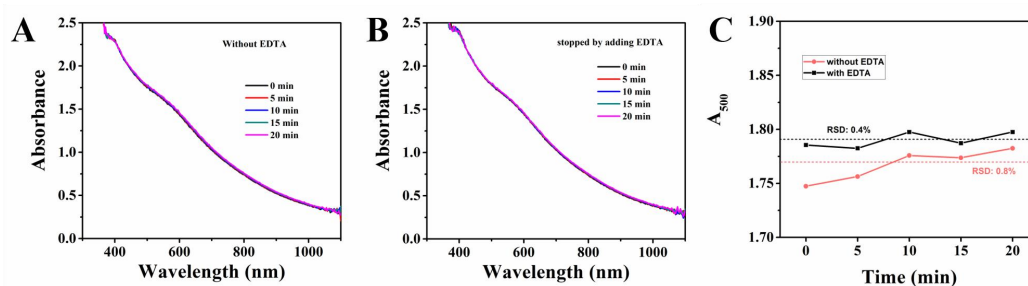

**Figure S10.** Signal stability at room temperature after cooling (A) and after cooling and chelating with EDTA (B), respectively.  $A_{500}$  vs time (C). Default detection conditions in the presence of  $5 \mu\text{M}$   $\text{Cu}^{2+}$ .

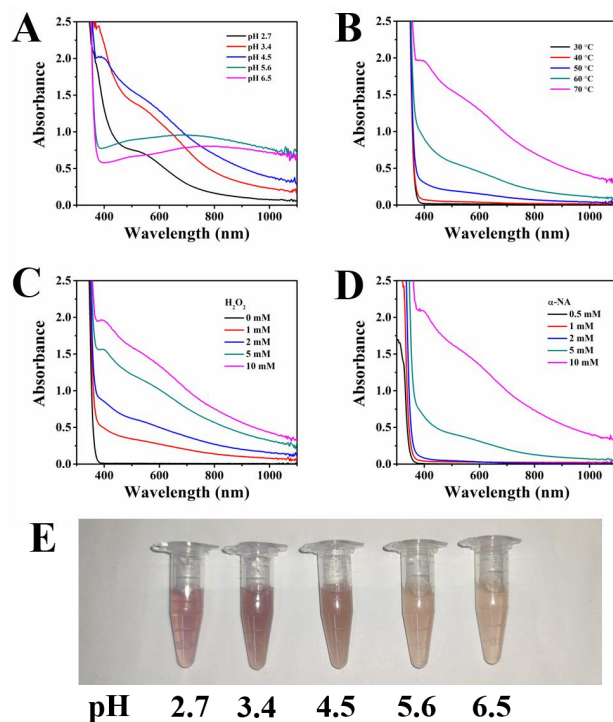

**Figure S11.** Effect of (A) pH, (B) reaction temperature, (C)  $\text{H}_2\text{O}_2$  concentration, and (D)  $\alpha$ -NA

concentration on the UV-vis absorption spectra of  $\alpha$ -NA oxidation by  $H_2O_2$  in the presence of  $Cu^{2+}$ . (E) Corresponding photographs of reaction solutions after the reaction at pH 2.7, pH 3.4, pH 4.5, pH 5.6, and pH 6.5, respectively. Unless specified, the default reaction condition was used.

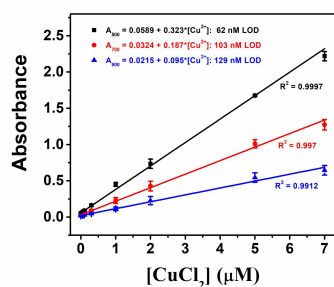

**Figure S12.** Comparison of calibration plots of  $A_{500}$ ,  $A_{700}$ , and  $A_{900}$  vs  $Cu^{2+}$  concentration.

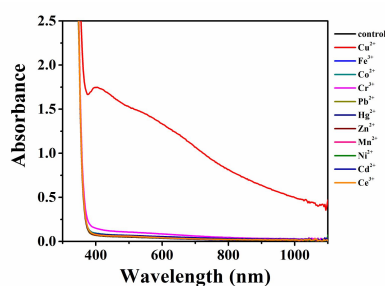

**Figure S13.** Absorption spectra of  $\alpha$ -NA after reaction at the default detection condition in the presence of different metallic cations.  $[Cu^{2+}] = 5 \mu M$ ,  $[M^{2+} \text{ or } M^{3+}] = 50 \mu M$ . Control group was reaction solutions without adding metallic cations.

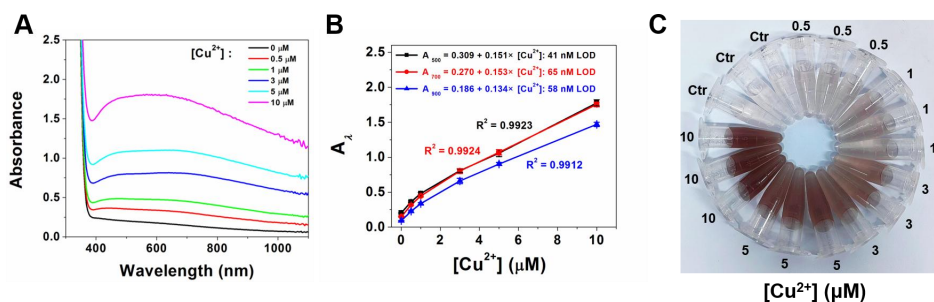

**Figure S14** Detection of copper (II) ions in the presence of tap water. (A) Absorbance spectra of reaction solutions at different concentrations of copper (II) ions after reacting at  $70^{\circ}C$  20 min and then stopped by ice cold water. (B)  $A_{500}$ ,  $A_{700}$ , and  $A_{900}$  vs concentration of added copper (II) ions. (C) Photographs of three parallel experiment samples containing  $100 \mu l$  tap water after reaction at the default reaction condition.

## Supplementary Table Information

**Table S1 Comparison of colorimetric assays and non-colorimetric methods for  $Cu^{2+}$  detection**

| Sensing mechanism                                                                                                                                 | Linear range                                 | LOD                          | Reference |
|---------------------------------------------------------------------------------------------------------------------------------------------------|----------------------------------------------|------------------------------|-----------|
| Cation exchange of copper ion with zinc ion in ZnS shell of the ZnO@ZnS NP to form a colored CuS shell                                            | 15–1500 $\mu\text{M}$                        | 15 $\mu\text{M}$             | 1         |
| Formation of a colorless complex between yellow naphthalenediimideamphiphile and $\text{Cu}^{2+}$                                                 | —                                            | 260 nM                       | 2         |
| $\text{Cu}^{2+}$ -induced aggregation of AgNP modified by 1,3-alternate calix[4]arene                                                             | —                                            | 2.5 $\mu\text{M}$            | 3         |
| $\text{Cu}^{2+}$ -catalysed TMB oxidation by $\text{H}_2\text{O}_2$ (signal amplification via forming $\text{Cu}^{2+}$ -G-quadruplex DNA complex) | 5–60 $\mu\text{M}$<br>(0.1–5 $\mu\text{M}$ ) | 2.6 $\mu\text{M}$<br>(76 nM) | 4         |
| $\text{Cu}^{2+}$ -assisted TMB oxidation in AgNP suspension containing $\text{Na}_2\text{S}_2\text{O}_3$                                          | 1–100 $\mu\text{M}$                          | 100 nM                       | 5         |
| $\text{Cu}^{2+}$ -triethylamine complex –catalyzed TMB and dopamine oxidation by $\text{H}_2\text{O}_2$                                           | 0.0625–8.0 $\mu\text{M}$                     | 62.5 nM                      | 6         |
| $\text{Cu}^{2+}$ -catalyzed oxidation coupling of $\alpha$ -naphthylamine via Cu-Fenton mechanism                                                 | 0.05–7 $\mu\text{M}$                         | 62 nM                        | This work |
| Electrochemical sensor based on current change of Pi-A/RGO modified electrode upon selective binding of $\text{Cu}^{2+}$ to Pi-A                  | 0.08–4.7 $\mu\text{M}$                       | 10.5 nM                      | 7         |
| Fluorescence probe based on $\text{Cu}^{2+}$ -catalyzed hydrolysis reaction                                                                       | 0-10 $\mu\text{M}$                           | 36 nM                        | 8         |
| Turn-on red-emitting fluorescence probe based on selective cleaving of picolinoyl ester by $\text{Cu}^{2+}$                                       | 0.02-8 $\mu\text{M}$                         | 4 nM                         | 9         |

## References

- 1 A. Sadollahkhani, A. Hatamie, O. Nur, M. Willander, B. Zargar and I. Kazeminezhad, *ACS Appl. Mater. Interfaces*, 2014, **6**, 17694-17701.
- 2 N. V. Ghule, R. S. Bhosale, A. L. Puyad, S. V. Bhosale and S. V. Bhosale, *Sens. Actuators, B*, 2016, **227**, 17-23.
- 3 G. Nsengiyuma, R. Hu, J. Li, H. Li and D. Tian, *Sens. Actuators, B*, 2016, **236**, 675-681.
- 4 X. Wei, H. Xu, W. Li and Z. Chen, *Sens. Actuators, B*, 2017, **241**, 498-503.
- 5 Z. Zhang, W. Zhao, C. Hu, D. Guo and Y. Liu, *J. Sci.: Adv. Mater. Devices*, 2022, **7**, 100420.
- 6 H. Zhou, T. Chai, L. Peng, W. Zhang, T. Tian, H. Zhang and F. Yang, *Dyes Pigm.*, 2023, **210**, 111028.
- 7 L. Yang, N. Huang, L. Huang, M. Liu, H. Li, Y. Zhang, S. Yao, *Anal. Methods*, 2017, **9**, 618-624.
- 8 Z. Zhou, S. Chen, Y. Huang, B. Gu, J. Li, C. Wu, P. Yin, Y. Zhang, H. Li, *Biosensors and Bioelectronics*, 2022, **198**, 113858
- 9 Z. Zhou, H. Tang, S. Chen, Y. Huang, X. Zhu, H. Li, Y. Zhang, S. Yao, *Food Chemistry*, 2021, **343**, 128513.
